# Supplementary material for: Comparing three summary indices to assess diet quality of Canadian children: a call for consensus
Source: Frontiers journal article supplement (doi:10.3389/fnut.2024.1519829), 2025-01-07
Supplement: Data_Sheet_1.pdf [file Data_Sheet_1.pdf]

## Supplementary Material

# Comparing three summary indices to assess diet quality of Canadian children: a call for consensus

Syedehatefeh Panahimoghadam, Paul J. Veugeliers, Julia Dabravolskaj, Trudy Tran, Katerina Maximova\*

\* **Correspondence:** Katerina Maximova: katerina.maximova@utoronto.ca

## 1 Supplementary Table

Components and scoring standards for HEI-C 2015, DQI-I, HEFI-2019

| Category (points) | Component (points)               | Measurement Unit                       | Maximum score      | Minimum score                       |
|-------------------|----------------------------------|----------------------------------------|--------------------|-------------------------------------|
| <b>HEI-C 2015</b> |                                  |                                        |                    |                                     |
| Adequacy (60)     | Total Fruits and Vegetables (10) | Servings/d                             | 6 servings         | No Fruits and Vegetables            |
|                   | Whole Fruits (5)                 | Servings/d                             | 1.26 servings      | No Whole Fruits                     |
|                   | Greens & Beans (5)               | Servings/d                             | 0.63 servings      | No Dark Green Vegetables or Legumes |
|                   | Whole Grains (10)                | Servings/d                             | 3 servings         | No Whole Grains                     |
|                   | Total Protein Foods (5)          | Servings/d                             | 1-2 servings       | No Protein Foods                    |
|                   | Seafood & Plant Proteins (5)     | Servings/d                             | 0.32-0.64 servings | No Seafood or Plant Proteins        |
|                   | Dairy (10)                       | Servings/d                             | 3-4 servings       | No Dairy                            |
| Moderation (40)   | Fatty Acids (10)                 | (PUFA + MUFA)/SFA                      | ≥2.5               | ≤1.2                                |
|                   | Refined Grains (10)              | Total refined grain/ Total grain foods | <50%               | 100%                                |
|                   | Added Sugars (10)                | Of total energy/d                      | ≤6.5%              | ≥26%                                |
|                   | Saturated Fats (10)              | Of total energy/d                      | ≤8%                | ≥16%                                |
|                   | Sodium (10)                      | UL (mg/d)                              | ≤UL (≤2200 mg/d)   | ≥2xUL (≥4400)                       |
| <b>DQI-I</b>      |                                  |                                        |                    |                                     |
| Adequacy (40)     | Vegetable group (5)              | Servings/d                             | ≥3-5               | 0                                   |
|                   | Fruit group (5)                  | Servings/d                             | ≥ 2-4              | 0                                   |
|                   | Fiber (5)                        | DRI (g/d)                              | ≥20-30             | 0                                   |
|                   | Grain group (5)                  | Servings/d                             | ≥6-11              | 0                                   |
|                   | Protein (5)                      | of total energy/d                      | ≥10%               | 0%                                  |
|                   | Iron (5)                         | RDA (AI)/d                             | ≥100%              | 0%                                  |
|                   | Calcium (5)                      | AI/d                                   | ≥100%              | 0%                                  |

|                         |                                                                                                   |                                                                                  |                                   |                                       |
|-------------------------|---------------------------------------------------------------------------------------------------|----------------------------------------------------------------------------------|-----------------------------------|---------------------------------------|
| Moderation<br>(30)      | Vitamin C (5)                                                                                     | RDA (RNI)/d                                                                      | ≥100%                             | 0%                                    |
|                         | Total fat (6)                                                                                     | Of total energy/d                                                                | ≤20%                              | >30%                                  |
|                         | Cholesterol (6)                                                                                   | mg/d                                                                             | ≤300                              | >400                                  |
|                         | Saturated fats (6)                                                                                | Of total energy/d                                                                | ≤7%                               | >10%                                  |
|                         | Empty calorie foods (6)                                                                           | Of total energy/d                                                                | ≤3%                               | >10%                                  |
| Variety (20)            | Sodium (6)                                                                                        | mg/d                                                                             | ≤2400                             | >3400                                 |
|                         | Overall food group variety (meat, poultry, fish, egg; dairy, beans; grain; fruit; vegetable) (15) | Servings from food groups/d                                                      | ≥1 serving from each food group/d | None from any food groups             |
|                         | Within-group variety for protein source (meat, poultry, fish, dairy, beans, eggs) (5)             | Number of different sources/d                                                    | ≥3 different sources/d            | None                                  |
|                         |                                                                                                   |                                                                                  | P/S = 1-1.5 and M/S = 1-1.5       |                                       |
| Overall<br>balance (10) | Fatty acid ratio (PUFA:MUFA:SFA) (4)                                                              | P/S and M/S                                                                      | 1-1.5                             | Otherwise                             |
|                         | Macronutrient ratio (carbohydrate:protein:fat) (6)                                                | Carbohydrate:protein:fat                                                         | 55-65:10-15:15-25                 |                                       |
| <b>HEFI-2019</b>        |                                                                                                   |                                                                                  |                                   |                                       |
| Foods (40)              | Vegetables and fruits (20)                                                                        | Total vegetables and fruits/Total foods (RA/RA)                                  | ≥0.50                             | No fruits and vegetables              |
|                         | Whole grain foods (5)                                                                             | Total whole grain foods/Total foods (RA/RA)                                      | ≥0.25                             | No whole-grain foods                  |
|                         | Grain foods ratio (5)                                                                             | Total whole-grain foods/Total grain foods (RA/RA)                                | 1                                 | No whole-grain foods                  |
|                         | Protein foods (5)                                                                                 | Total protein foods/Total foods (RA/RA)                                          | ≥0.25                             | No Protein foods                      |
| Nutrients (30)          | Plant-based protein foods (5)                                                                     | Plant-based protein foods/Total protein foods (RA/RA)                            | ≥0.5                              | No plant-based protein foods          |
|                         | Saturated fats (5)                                                                                | Total saturated fat/energy (kcal/kcal)                                           | <10%                              | ≥15%                                  |
|                         | Free sugars (10)                                                                                  | Total free sugars / energy (kcal/kcal)                                           | <10%                              | ≥20%                                  |
|                         | Sodium (10)                                                                                       | Total sodium / energy (mg/kcal)                                                  | <0.9                              | ≥2.0                                  |
|                         | Fatty acids ratio (5)                                                                             | (Mono + polyunsaturated fat)/Total saturated fat (g/g)                           | ≥2.6                              | ≤1.1                                  |
| Beverages<br>(10)       |                                                                                                   | (Plain water including carbonated + unsweetened beverages)/Total beverages (g/g) |                                   | No water and no unsweetened beverages |
|                         | Beverages (10)                                                                                    |                                                                                  | 1                                 |                                       |

Abbreviations: HEI-C 2015, Healthy Eating Index-Canada 2015; DQI-I, Diet Quality Index-International; HEFI-2019, Healthy Eating Food Index 2019; RA, Reference Amounts; DRI, Dietary Reference Intakes; RDA, Recommended Dietary Allowance; AI, Adequate Intakes; RNI, Recommended Nutrient Intake; PUFA, polyunsaturated fatty acids; MUFA, monounsaturated fatty acids; SFA, saturated fatty acids; UL, Tolerable Upper Intake Level.
